# Supplementary material for: Interaction between calf thymus DNA and cationic bottle-brush copolymers: equilibrium and stopped-flow kinetic studies
Source: Royal Society of Chemistry journal article supplement (doi:10.1039/c4cp03309d), 2014-11-27
Supplement: c4cp03309d1.pdf [file c4cp03309d1.pdf]

## Electronic Supporting Information

### Interaction between Calf Thymus DNA and Cationic Bottle-Brush Copolymers: Equilibrium and Stopped-Flow Kinetic Studies

Debabrata Dey,<sup>†</sup>Chiranjit Maiti,<sup>†</sup>Souvik Maiti,<sup>‡</sup>Dibakar Dhara<sup>\*†</sup>

<sup>†</sup>*Department of Chemistry, Indian Institute of Technology Kharagpur,  
West Bengal 721302, India*

<sup>‡</sup>*Proteomics and Structural Biology Unit, Institute of Genomics and Integrative Biology, CSIR,  
Mall Road, Delhi 110007, India*

---

**Table S1:** The size data for the polyplexes at various charge ratios. Deconvolutions of the autocorrelation function were carried out using CONTIN software.

| <b>Z<sub>+/-</sub></b> | <b>Size 1 (nm)</b> | <b>Size 2 (nm)</b> |
|------------------------|--------------------|--------------------|
| <b>BBCP31</b>          |                    |                    |
| <b>0</b>               | 780.2 (100%)       | -                  |
| <b>0.4</b>             | 309.0 (49.7%)      | 76.0 (50.3%)       |
| <b>0.6</b>             | 255.0 (75.5%)      | 77.0 (40.6%)       |
| <b>1.0</b>             | 216.4 (86.1%)      | 63.0 (13.9%)       |
| <b>2.0</b>             | 906.0 (100.0 %)    | -                  |
| <b>6.0</b>             | 2104.0 (100%)      | -                  |
| <b>9.0</b>             | 1627.0 (100%)      | -                  |
| <b>12.0</b>            | 1932.0 (100%)      | -                  |
| <b>BBCP16</b>          |                    |                    |
| <b>0</b>               | 785.0 (100%)       | -                  |
| <b>0.4</b>             | 295.3 (44.8%)      | 85.7 (55.2%)       |
| <b>0.6</b>             | 143.4 (89.9%)      | 39.7 (10.1%)       |
| <b>1.0</b>             | 137.6 (93.8%)      | 21.5 (6.2%)        |
| <b>2.0</b>             | 1080 (58.7%)       | 339.9 (41.3%)      |
| <b>6.0</b>             | 1931 (100%)        | -                  |
| <b>9.0</b>             | 1894 (100%)        | -                  |
| <b>12.0</b>            | 1526 (100%)        |                    |

**Table S2:** Relative rate constants for the binding of different cationic BBCPs to *ct*DNA as a function of charge ratio,  $Z_{+/-}$  at a fixed concentration of *ct*DNA and temperature.

| Cationic polymer | Charge Ratio ( $Z_{+/-}$ ) | $k_1 \times 10^1$ ( $S^{-1}$ ) | $k_2 \times 10^2$ ( $S^{-1}$ ) |
|------------------|----------------------------|--------------------------------|--------------------------------|
| PMAPTAC*         | 1.0                        | $3.81 \pm 0.10$                | $1.12 \pm 0.03$                |
|                  | 3.0                        | $6.74 \pm 0.20$                | $1.18 \pm 0.03$                |
|                  | 9.0                        | $9.48 \pm 0.20$                | $1.47 \pm 0.04$                |
| BBCP31           | 1.0                        | $4.20 \pm 0.03$                | $1.53 \pm 0.03$                |
|                  | 3.0                        | $7.16 \pm 0.08$                | $1.62 \pm 0.06$                |
|                  | 9.0                        | $9.67 \pm 0.22$                | $2.46 \pm 0.08$                |
| BBCP16           | 1.0                        | $4.81 \pm 0.05$                | $2.10 \pm 0.03$                |
|                  | 3.0                        | $7.55 \pm 0.10$                | $2.22 \pm 0.06$                |
|                  | 9.0                        | $10.74 \pm 0.24$               | $2.54 \pm 0.09$                |

\*from ref 13

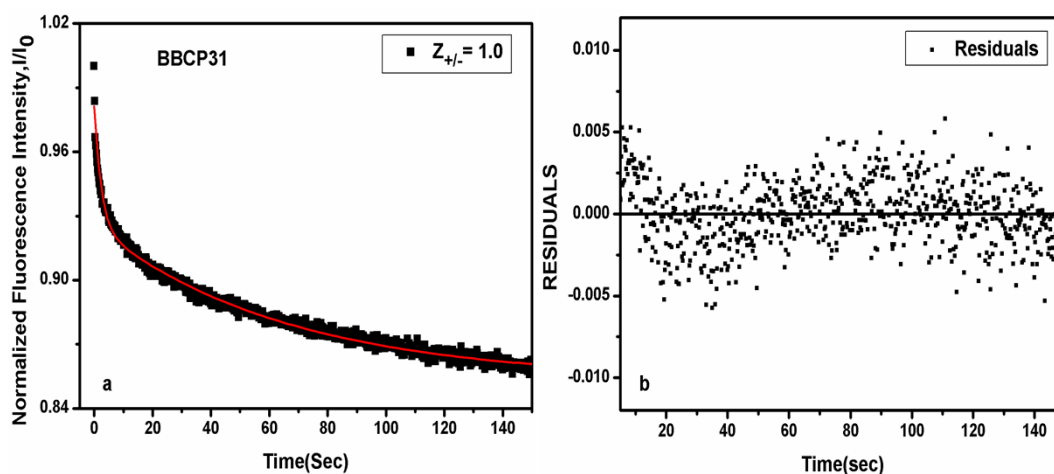

**Figure S1:** (a) Stopped-flow fluorescence intensity decay of *ct*DNA-BBCP31 binding at  $Z_{+/-} = 1.0$  as a function of time. The smooth line in panel shows the fitting obtained with eq. 2. The residuals of the fit are shown in (b).
